# Supplementary material for: Genome-wide Analysis of Core Histone Genes and Expression Dynamics of the H3 subfamily in Brassica napus
Source: Research Square preprint supplement (doi:10.21203/rs.3.rs-8114797/v1), 2025-12-05
Supplement: Supplementary file 1 [file 0f7067395cf8167c003635ba.xlsx]

## Sheet: Sheet1
Analyze the selection pressure in the evolutionary process of B.napus based on the Ka/Ks value
Seq_1	Seq_2	Ka	Ks	Ka/Ks	EffectiveLen	AverageS-sites	AverageN-sites	cN	cS	pN	pS	Note
BnaA01T0312800ZS	BnaA05T0350900ZS	0.0101324	0.465519	0.0217659	399	100.917	298.083	3	35	0.0100643	0.346821
BnaA01T0312800ZS	BnaA05T0174500ZS	0.0413541	0.873978	0.0473172	399	100.75	298.25	12	52	0.0402347	0.516129
BnaA01T0347400ZS	BnaA05T0165200ZS	0.0415508	0.930143	0.0446714	402	101	301	12.1667	53.8333	0.0404208	0.533003
BnaA01T0347400ZS	BnaA06T0017100ZS	0.0444575	1.05096	0.0423017	402	100.833	301.167	13	57	0.0431655	0.565289
BnaA01T0165400ZS	BnaA10T0108500ZS	0.0390968	0.931285	0.0419816	390	101.25	288.75	11	54	0.0380952	0.533333
BnaA01T0165400ZS	BnaC01T0212600ZS	0.00341978	0.150098	0.0227836	396	102.917	293.083	1	14	0.003412	0.136032
BnaA01T0312800ZS	BnaC01T0386900ZS	0.00333149	0.0835646	0.0398672	402	101.167	300.833	1	8	0.0033241	0.0790774
BnaA01T0347400ZS	BnaC01T0429800ZS	0	0.105067	0	402	102	300	0	10	0	0.0980392
BnaA01T0347400ZS	BnaC03T0793100ZS	0.0416338	1.15404	0.0360767	402	101.583	300.417	12.1667	59.8333	0.0404993	0.589007
BnaA01T0312800ZS	BnaC03T0444300ZS	0.0067492	0.409908	0.0164652	399	101.333	297.667	2	32	0.00671892	0.315789
BnaA01T0312800ZS	BnaC05T0383300ZS	0.0135559	0.427624	0.0317004	399	101.25	297.75	4	33	0.0134341	0.325926
BnaA01T0312800ZS	BnaC05T0293200ZS	0.0342819	1.01708	0.0337063	399	100.583	298.417	10	56	0.0335102	0.556752
BnaA01T0347400ZS	BnaC06T0069300ZS	0.0409658	0.935869	0.043773	402	101	301	12	54	0.0398671	0.534653
BnaA01T0347400ZS	BnaC06T0123500ZS	0.041539	1.00365	0.041388	402	100.917	301.083	12.1667	55.8333	0.0404096	0.553262
BnaA01T0165400ZS	BnaC09T0370600ZS	0.0354781	0.803293	0.0441658	390	101.417	288.583	10	50	0.034652	0.493016
BnaA02T0101700ZS	BnaA03T0100600ZS	0.00607445	0.412718	0.0147181	444	113.417	330.583	2	36	0.00604991	0.317414
BnaA02T0372700ZS	BnaA06T0348400ZS	0.0563498	0.646383	0.0871772	447	115.417	331.583	18	50	0.054285	0.433213
BnaA02T0216700ZS	BnaA07T0245800ZS	0	0.381873	0	408	100.25	307.75	0	30	0	0.299252
BnaA02T0372700ZS	BnaA09T0057400ZS	0.0571554	0.441279	0.129522	441	113.917	327.083	18	38	0.0550318	0.333577
BnaA02T0101700ZS	BnaC02T0123100ZS	0.00607291	0.134979	0.0449917	444	113.333	330.667	2	14	0.00604839	0.123529
BnaA02T0216700ZS	BnaC02T0289900ZS	0	0.118954	0	408	100	308	0	11	0	0.11
BnaA02T0360500ZS	BnaC02T0484400ZS	0	0.181157	0	408	99.4167	308.583	0	16	0	0.160939
BnaA02T0372700ZS	BnaC02T0498900ZS	0.0181369	0.0617088	0.293911	453	118.167	334.833	6	7	0.0179194	0.0592384
BnaA02T0101700ZS	BnaC03T0114500ZS	0.00607598	0.367857	0.0165172	444	113.5	330.5	2	33	0.00605144	0.290749
BnaA02T0216700ZS	BnaC06T0270500ZS	0	0.334364	0	408	100.083	307.917	0	27	0	0.269775
BnaA02T0372700ZS	BnaC07T0346000ZS	0.0530504	0.670303	0.079144	447	115.083	331.917	17	51	0.0512177	0.443157
BnaA02T0372700ZS	BnaC09T0044700ZS	0.0728648	0.655043	0.111237	429	112.167	316.833	22	49	0.0694371	0.43685
BnaA02T0101700ZS	BnaC09T0433100ZS	0.0183683	0.428588	0.0428577	444	113.333	330.667	6	37	0.0181452	0.326471
BnaA03T0100300ZS	BnaA06T0183600ZS	0.0564819	1.33776	0.0422214	411	92.4167	318.583	17.3333	57.6667	0.0544075	0.623986
BnaA03T0230900ZS	BnaA07T0164000ZS	0.0145671	0.547113	0.0266254	447	100.417	346.583	5	39	0.0144265	0.388382
BnaA03T0100300ZS	BnaC02T0122800ZS	0.0457916	0.596436	0.0767755	420	93.5833	326.417	14.5	38.5	0.0444218	0.411398
BnaA03T0100600ZS	BnaC02T0123100ZS	0.00607137	0.477482	0.0127154	444	113.25	330.75	2	40	0.00604686	0.353201
BnaA03T0100300ZS	BnaC03T0114000ZS	0.00306906	0.148491	0.0206683	423	96.5	326.5	1	13	0.00306279	0.134715
BnaA03T0100600ZS	BnaC03T0114500ZS	0.00607445	0.114053	0.0532597	444	113.417	330.583	2	12	0.00604991	0.105805
BnaA03T0230900ZS	BnaC03T0272400ZS	0	0.106373	0	453	100.833	352.167	0	10	0	0.0991736
BnaA03T0230900ZS	BnaC04T0193300ZS	0.0146525	0.475317	0.0308268	444	99.4167	344.583	5	35	0.0145103	0.352054
BnaA03T0230900ZS	BnaC04T0486900ZS	0.00850068	0.691131	0.0122997	459	104.083	354.917	3	47	0.00845269	0.451561
BnaA03T0100300ZS	BnaC09T0433600ZS	0.0347156	0.569298	0.0609797	417	92.75	324.25	11	37	0.0339244	0.398922
BnaA03T0100600ZS	BnaC09T0433100ZS	0.0121923	0.429013	0.0284194	444	113.25	330.75	4	37	0.0120937	0.326711
BnaA04T0072600ZS	BnaC04T0331500ZS	0.00621765	0.200353	0.0310335	414	91	323	2	16	0.00619195	0.175824
BnaA04T0072600ZS	BnaC08T0338100ZS	0.00622572	0.492341	0.0126451	414	91.4167	322.583	2	33	0.00619995	0.360985
BnaA05T0174500ZS	BnaA05T0350900ZS	0.0378087	0.814091	0.0464429	399	100.667	298.333	11	50	0.0368715	0.496689
BnaA05T0165200ZS	BnaA06T0017100ZS	0	0.244928	0	405	100.5	304.5	0	21	0	0.208955
BnaA05T0174500ZS	BnaA08T0022200ZS	0.0273223	0.503915	0.05422	399	100.833	298.167	8	37	0.0268306	0.366942
BnaA05T0350900ZS	BnaC01T0386900ZS	0.0135329	0.466587	0.0290041	399	100.75	298.25	4	35	0.0134116	0.347395
BnaA05T0174500ZS	BnaC01T0386900ZS	0.0448797	0.943622	0.047561	399	100.583	298.417	13	54	0.0435632	0.536868
BnaA05T0165200ZS	BnaC01T0429800ZS	0.0380908	0.924108	0.041219	402	101.333	300.667	11.1667	53.8333	0.0371397	0.53125
BnaA05T0350900ZS	BnaC03T0444300ZS	0.0067473	0.393478	0.0171478	399	101.25	297.75	2	31	0.00671704	0.306173
BnaA05T0165200ZS	BnaC03T0793100ZS	0.00661343	0.256563	0.025777	405	101.25	303.75	2	22	0.00658436	0.217284
BnaA05T0174500ZS	BnaC03T0444300ZS	0.0449573	0.779546	0.0576711	399	101.083	297.917	13	49	0.0436364	0.484749
BnaA05T0350900ZS	BnaC05T0383300ZS	0.00336512	0.0835646	0.0402697	399	101.167	297.833	1	8	0.00335758	0.0790774
BnaA05T0174500ZS	BnaC05T0293200ZS	0.0067265	0.166735	0.0403425	399	100.333	298.667	2	15	0.00669643	0.149502
BnaA05T0350900ZS	BnaC05T0293200ZS	0.0307735	0.94519	0.032558	399	100.5	298.5	9	54	0.0301508	0.537313
BnaA05T0174500ZS	BnaC05T0383300ZS	0.0378521	0.809253	0.0467741	399	101	298	11	50	0.0369128	0.49505
BnaA05T0165200ZS	BnaC06T0069300ZS	0	0.191329	0	405	100.667	304.333	0	17	0	0.168874
BnaA05T0165200ZS	BnaC06T0123500ZS	0	0.118207	0	405	100.583	304.417	0	11	0	0.109362
BnaA06T0053300ZS	BnaA08T0297600ZS	0.00317125	0.27076	0.0117124	426	110	316	1	25	0.00316456	0.227273
BnaA06T0348400ZS	BnaA09T0057400ZS	0.0352826	0.436554	0.0808206	450	116.333	333.667	11.5	38.5	0.0344655	0.330946
BnaA06T0053300ZS	BnaA09T0664300ZS	0.100214	0.389346	0.257392	426	109.75	316.25	29.6667	33.3333	0.0938076	0.303721
BnaA06T0017100ZS	BnaC01T0429800ZS	0.0374865	1.12744	0.0332492	402	101.167	300.833	11	59	0.0365651	0.583196
BnaA06T0348400ZS	BnaC02T0498900ZS	0.0844617	0.746731	0.113109	447	115.25	331.75	26.5	54.5	0.0798794	0.472885
BnaA06T0183600ZS	BnaC02T0122800ZS	0.0498648	0.953801	0.0522802	408	90.1667	317.833	15.3333	48.6667	0.0482433	0.539741
BnaA06T0183600ZS	BnaC03T0608100ZS	0.00651647	0.150978	0.0431617	396	87.75	308.25	2	12	0.00648824	0.136752
BnaA06T0017100ZS	BnaC03T0793100ZS	0.00329761	0.314998	0.0104687	405	101.083	303.917	1	26	0.00329038	0.257214
BnaA06T0183600ZS	BnaC03T0114000ZS	0.0565434	1.32453	0.0426895	411	92.75	318.25	17.3333	57.6667	0.0544645	0.621743
BnaA06T0048400ZS	BnaC05T0060300ZS	0.0395424	0.11901	0.332262	741	174.167	566.833	21.8333	19.1667	0.0385181	0.110048
BnaA06T0053300ZS	BnaC05T0066200ZS	0	0.117793	0	426	110.083	315.917	0	12	0	0.109008
BnaA06T0017100ZS	BnaC06T0069300ZS	0	0.154105	0	405	100.5	304.5	0	14	0	0.139303
BnaA06T0017100ZS	BnaC06T0123500ZS	0	0.218047	0	405	100.417	304.583	0	19	0	0.189212
BnaA06T0348400ZS	BnaC07T0346000ZS	0.00295713	0.130156	0.0227199	456	117.167	338.833	1	14	0.0029513	0.119488
BnaA06T0053300ZS	BnaC08T0189200ZS	0.00317125	0.353412	0.00897323	426	110	316	1	31	0.00316456	0.281818
BnaA06T0053300ZS	BnaC08T0528800ZS	0.069452	0.433111	0.160356	426	109.417	316.583	21	36	0.0663332	0.329018
BnaA06T0183600ZS	BnaC09T0433600ZS	0.0440583	0.885039	0.0497812	405	89.5	315.5	13.5	46.5	0.0427892	0.519553
BnaA06T0348400ZS	BnaC09T0044700ZS	0.0393895	0.50749	0.0776162	441	115.25	325.75	12.5	42.5	0.038373	0.368764
BnaA07T0245800ZS	BnaC02T0289900ZS	0	0.367029	0	408	99.9167	308.083	0	29	0	0.290242
BnaA07T0164000ZS	BnaC03T0272400ZS	0.0146525	0.576651	0.0254096	444	99.4167	344.583	5	40	0.0145103	0.402347
BnaA07T0164000ZS	BnaC04T0486900ZS	0.0101647	0.280794	0.0362	447	100.333	346.667	3.5	23.5	0.0100962	0.234219
BnaA07T0164000ZS	BnaC04T0193300ZS	0	0.143821	0	444	99.3333	344.667	0	13	0	0.130872
BnaA07T0245800ZS	BnaC06T0270500ZS	0	0.167358	0	408	100	308	0	15	0	0.15
BnaA08T0297600ZS	BnaA09T0664300ZS	0.0966634	0.435853	0.22178	426	109.917	316.083	28.6667	36.3333	0.0906934	0.330553
BnaA08T0297600ZS	BnaC05T0066200ZS	0.00317377	0.257131	0.012343	426	110.25	315.75	1	24	0.00316706	0.217687
BnaA08T0022200ZS	BnaC05T0293200ZS	0.0203863	0.413529	0.0492984	399	100.667	298.333	6	32	0.0201117	0.317881
BnaA08T0297600ZS	BnaC08T0528800ZS	0.0660311	0.536585	0.123058	426	109.583	316.417	20	42	0.0632078	0.38327
BnaA08T0297600ZS	BnaC08T0189200ZS	0	0.117696	0	426	110.167	315.833	0	12	0	0.108926
BnaA09T0694800ZS	BnaA09T0716200ZS	0.0262691	0.140881	0.186463	543	136.25	406.75	10.5	17.5	0.0258144	0.12844
BnaA09T0057400ZS	BnaC02T0498900ZS	0.0677333	0.458182	0.147831	438	113.75	324.25	21	39	0.0647648	0.342857
BnaA09T0504600ZS	BnaC04T0323800ZS	0.136487	0.576036	0.236941	522	129.333	392.667	49	52	0.124788	0.402062
BnaA09T0664300ZS	BnaC05T0066200ZS	0.100299	0.403598	0.248513	426	110	316	29.6667	34.3333	0.0938819	0.312121
BnaA09T0504600ZS	BnaC06T0189900ZS	0.0264345	0.471456	0.0560698	408	100	308	8	35	0.025974	0.35
BnaA09T0057400ZS	BnaC07T0346000ZS	0.0444461	0.448572	0.0990835	453	117	336	14.5	39.5	0.0431548	0.337607
BnaA09T0504600ZS	BnaC08T0345800ZS	0.108762	0.316202	0.343963	555	132.75	422.25	42.75	34.25	0.101243	0.258004
BnaA09T0664300ZS	BnaC08T0528800ZS	0.0523088	0.0669234	0.781622	426	109.333	316.667	16	7	0.0505263	0.0640244
BnaA09T0664300ZS	BnaC08T0189200ZS	0.097864	0.446777	0.219044	426	109.917	316.083	29	37	0.091748	0.336619
BnaA09T0057400ZS	BnaC09T0044700ZS	0.00310319	0.143177	0.0216738	438	115.083	322.917	1	15	0.00309677	0.13034
BnaA09T0091200ZS	BnaC09T0087900ZS	0	0.0516111	0	408	100.25	307.75	0	5	0	0.0498753
BnaA10T0108500ZS	BnaC01T0212600ZS	0.0355306	1.02875	0.0345375	390	101.833	288.167	10	57	0.0347021	0.559738
BnaA10T0161600ZS	BnaC03T0109900ZS	0.020151	0.431017	0.0467523	423	96.0833	326.917	6.5	31.5	0.0198827	0.32784
BnaA10T0108500ZS	BnaC09T0370600ZS	0.00346821	0.0727213	0.0476919	390	101	289	1	7	0.00346021	0.0693069
BnaA10T0161600ZS	BnaC09T0444600ZS	0.0030667	0.161697	0.0189657	423	96.25	326.75	1	14	0.00306044	0.145455
BnaC01T0429800ZS	BnaC03T0793100ZS	0.0381668	1.24137	0.0307455	402	101.917	300.083	11.1667	61.8333	0.0372119	0.606705
BnaC01T0386900ZS	BnaC03T0444300ZS	0.010141	0.482503	0.0210175	399	101.167	297.833	3	36	0.0100727	0.355848
BnaC01T0386900ZS	BnaC05T0383300ZS	0.0169738	0.483062	0.0351381	399	101.083	297.917	5	36	0.0167832	0.356142
BnaC01T0386900ZS	BnaC05T0293200ZS	0.0377762	1.10266	0.0342591	399	100.417	298.583	11	58	0.0368406	0.577593
BnaC01T0429800ZS	BnaC06T0123500ZS	0.03808	0.996738	0.0382046	402	101.25	300.75	11.1667	55.8333	0.0371294	0.55144
BnaC01T0429800ZS	BnaC06T0069300ZS	0.0375078	0.929768	0.040341	402	101.333	300.667	11	54	0.0365854	0.532895
BnaC01T0212600ZS	BnaC09T0370600ZS	0.0319197	0.885218	0.0360586	390	102	288	9	53	0.03125	0.519608
BnaC02T0122800ZS	BnaC03T0114000ZS	0.0410089	0.555856	0.0737761	420	94.25	325.75	13	37	0.0399079	0.392573
BnaC02T0123100ZS	BnaC03T0114500ZS	0.00607291	0.397971	0.0152597	444	113.333	330.667	2	35	0.00604839	0.308824
BnaC02T0122800ZS	BnaC03T0608100ZS	0.025051	1.10611	0.0226479	390	85.5833	304.417	7.5	49.5	0.0246373	0.578384
BnaC02T0289900ZS	BnaC06T0270500ZS	0	0.305039	0	408	99.75	308.25	0	25	0	0.250627
BnaC02T0498900ZS	BnaC07T0346000ZS	0.0810096	0.750452	0.107948	447	114.917	332.083	25.5	54.5	0.076788	0.474257
BnaC02T0498900ZS	BnaC09T0044700ZS	0.0594534	0.582617	0.102045	426	111.083	314.917	18	45	0.057158	0.405101
BnaC02T0122800ZS	BnaC09T0433600ZS	0.00919787	0.46857	0.0196297	420	91.8333	328.167	3	32	0.0091417	0.348457
BnaC02T0123100ZS	BnaC09T0433100ZS	0.0183589	0.512168	0.0358455	444	113.167	330.833	6	42	0.018136	0.371134
BnaC03T0114000ZS	BnaC03T0608100ZS	0.0522977	1.39757	0.0374205	396	89.1667	306.833	15.5	56.5	0.050516	0.633645
BnaC03T0272400ZS	BnaC04T0193300ZS	0.0146525	0.534461	0.0274154	444	99.4167	344.583	5	38	0.0145103	0.38223
BnaC03T0272400ZS	BnaC04T0486900ZS	0.00869785	0.711654	0.012222	447	100.083	346.917	3	46	0.00864761	0.459617
BnaC03T0444300ZS	BnaC05T0383300ZS	0.0101553	0.425735	0.0238536	399	101.583	297.417	3	33	0.0100869	0.324856
BnaC03T0793100ZS	BnaC06T0069300ZS	0.00329943	0.299483	0.0110171	405	101.25	303.75	1	25	0.00329218	0.246914
BnaC03T0793100ZS	BnaC06T0123500ZS	0.00661161	0.314676	0.0210109	405	101.167	303.833	2	26	0.00658256	0.257002
BnaC03T0220900ZS	BnaC06T0189900ZS	0.073165	0.812875	0.0900077	402	100.75	301.25	21	50	0.0697095	0.496278
BnaC03T0109900ZS	BnaC09T0444600ZS	0.0232938	0.395372	0.0589162	423	96	327	7.5	29.5	0.0229358	0.307292
BnaC03T0114000ZS	BnaC09T0433600ZS	0.044235	0.732749	0.0603685	420	94.0833	325.917	14	44	0.0429558	0.467671
BnaC03T0114500ZS	BnaC09T0433100ZS	0.0183683	0.383119	0.047944	444	113.333	330.667	6	34	0.0181452	0.3
BnaC03T0608100ZS	BnaC09T0433600ZS	0.033572	0.949516	0.035357	390	85.4167	304.583	10	46	0.0328317	0.538537
BnaC04T0193300ZS	BnaC04T0486900ZS	0.0102241	0.412199	0.0248038	444	99.3333	344.667	3.5	31.5	0.0101547	0.317114
BnaC04T0323800ZS	BnaC06T0189900ZS	0.00982815	0.316294	0.0310728	408	100.75	307.25	3	26	0.00976404	0.258065
BnaC04T0323800ZS	BnaC08T0345800ZS	0.155643	0.57848	0.269055	513	125.25	387.75	54.5	50.5	0.140554	0.403194
BnaC04T0331500ZS	BnaC08T0338100ZS	0.00622572	0.32314	0.0192663	414	91.4167	322.583	2	24	0.00619995	0.262534
BnaC05T0293200ZS	BnaC05T0383300ZS	0.0308087	0.974462	0.0316161	399	100.833	298.167	9	55	0.0301845	0.545455
BnaC05T0066200ZS	BnaC08T0189200ZS	0.00317377	0.323916	0.00979812	426	110.25	315.75	1	29	0.00316706	0.263039
BnaC05T0066200ZS	BnaC08T0528800ZS	0.0695095	0.482075	0.144188	426	109.667	316.333	21	39	0.0663857	0.355623
BnaC06T0069300ZS	BnaC06T0123500ZS	0	0.178784	0	405	100.583	304.417	0	16	0	0.159072
BnaC06T0189900ZS	BnaC08T0345800ZS	0.0264855	0.486441	0.0544476	408	100.583	307.417	8	36	0.0260233	0.357912
BnaC07T0346000ZS	BnaC09T0044700ZS	0.0363516	0.498763	0.0728836	438	113.917	324.083	11.5	41.5	0.0354847	0.364301
BnaC08T0189200ZS	BnaC08T0528800ZS	0.0660311	0.555484	0.118871	426	109.583	316.417	20	43	0.0632078	0.392395
