# Supplementary material for: Genome-wide Analysis of Core Histone Genes and Expression Dynamics of the H3 subfamily in Brassica napus
Source: Research Square preprint supplement (doi:10.21203/rs.3.rs-8114797/v1), 2025-12-05
Supplement: Supplementary file 2 [file 6bea8e28c52c3956af61ef84.xlsx]

## Sheet: Supplementary Table 1
CHF genes information
Gene name	rename	Number of Amino Acid	MW/kDa	Theoretical pI	Instability Index	Aliphatic Index	Grand Average of Hydropathicity
AT1G52740.1	AtH2A-01	134	14.27	10.28	33.97	95.45	-0.341
AT4G13570.2	AtH2A-02	124	13.79	9.17	37.38	110	-0.002
AT2G38810.1	AtH2A-03	136	14.37	10.48	32.08	100.51	-0.202
AT3G54560.1	AtH2A-04	136	14.54	10.32	26.03	95.51	-0.34
AT5G02560.2	AtH2A-05	177	18.89	10.6	42.56	81.02	-0.423
AT5G59870.1	AtH2A-06	150	15.97	10.55	41.31	88.53	-0.345
AT5G27670.1	AtH2A-07	150	15.91	10.47	36.18	85.33	-0.456
AT1G08880.1	AtH2A-08	142	14.81	10.32	37.87	88.66	-0.268
AT1G54690.1	AtH2A-09	142	14.78	10.32	39.82	89.37	-0.251
AT4G27230.1	AtH2A-10	131	13.83	10.05	47.57	93.97	-0.264
AT5G54640.1	AtH2A-11	130	13.66	10.16	43.83	95.46	-0.216
AT1G51060.1	AtH2A-12	132	13.93	10.1	38.82	93.26	-0.27
AT3G20670.1	AtH2A-13	132	13.85	10.16	37.99	95.45	-0.189
AT1G08170.1	AtH2B-01	243	27.22	8.42	48.37	70.04	-0.82
AT2G28720.1	AtH2B-02	151	16.53	10	27.78	73.11	-0.677
AT3G09480.1	AtH2B-03	126	13.97	10.06	23.73	72.06	-0.678
AT5G02570.1	AtH2B-04	132	14.54	10.06	27.47	76.21	-0.587
AT2G37470.1	AtH2B-05	138	15.08	10.05	20.95	73.62	-0.654
AT3G53650.1	AtH2B-06	138	15.22	10.08	31.34	73.62	-0.71
AT5G59910.1	AtH2B-07	150	16.45	10	25.27	69.07	-0.76
AT3G45980.1	AtH2B-08	150	16.44	10.02	26.05	69.07	-0.746
AT3G46030.1	AtH2B-09	145	15.91	10.02	26.31	70.07	-0.73
AT1G07790.1	AtH2B-10	148	16.4	10.05	32.89	70	-0.81
AT5G22880.1	AtH2B-11	145	15.73	10.05	25.88	70.83	-0.678
AT1G01370.1	AtH3-01	178	19.71	11.58	54.21	61.01	-0.774
AT5G12910.1	AtH3-02	131	14.91	10.71	38.06	75.34	-0.512
AT5G65350.1	AtH3-03	139	15.59	11.25	49.85	83.02	-0.537
AT1G19890.1	AtH3-04	137	15.73	11.44	38.34	84.16	-0.632
AT1G13370.1	AtH3-05	136	15.36	11.16	45	80.51	-0.608
AT1G75600.1	AtH3-06	136	15.4	11	38.16	85.51	-0.576
AT4G40040.1	AtH3-07	136	15.41	11.15	38.38	83.38	-0.602
AT5G10980.1	AtH3-08	136	15.41	11.15	38.38	83.38	-0.602
AT4G40030.2	AtH3-09	164	18.7	11.14	42.26	87.56	-0.43
AT5G10390.1	AtH3-10	136	15.27	11.29	43.01	81.99	-0.551
AT3G27360.1	AtH3-11	136	15.27	11.29	43.01	81.99	-0.551
AT1G09200.1	AtH3-12	136	15.27	11.29	43.01	81.99	-0.551
AT5G10400.1	AtH3-13	136	15.27	11.29	43.01	81.99	-0.551
AT5G65360.1	AtH3-14	136	15.27	11.29	43.01	81.99	-0.551
AT5G59970.1	AtH4-01	103	11.41	11.48	45.35	86.12	-0.524
AT3G45930.1	AtH4-02	103	11.41	11.48	45.35	86.12	-0.524
AT1G07660.1	AtH4-03	103	11.41	11.48	45.35	86.12	-0.524
AT2G28740.1	AtH4-04	103	11.41	11.48	45.35	86.12	-0.524
AT3G46320.1	AtH4-05	103	11.41	11.48	45.35	86.12	-0.524
AT5G59690.1	AtH4-06	103	11.41	11.48	45.35	86.12	-0.524
AT1G07820.1	AtH4-07	103	11.41	11.48	45.35	86.12	-0.524
AT3G53730.1	AtH4-08	103	11.41	11.48	45.35	86.12	-0.524
BnaA01T0347400ZS	BnH2A-01	134	14.23	10.25	31.42	91.79	-0.404
BnaC01T0429800ZS	BnH2A-02	134	14.23	10.25	31.42	91.79	-0.404
BnaA05T0165200ZS	BnH2A-03	135	14.4	10.28	36.73	95.48	-0.345
BnaA06T0017100ZS	BnH2A-04	135	14.4	10.28	36.73	95.48	-0.345
BnaC03T0793100ZS	BnH2A-05	135	14.42	10.28	34.67	95.48	-0.365
BnaC06T0069300ZS	BnH2A-06	135	14.4	10.28	36.73	95.48	-0.345
BnaC06T0123500ZS	BnH2A-07	135	14.4	10.28	36.73	95.48	-0.345
BnaC04T0323800ZS	BnH2A-08	187	20.29	10.49	33.27	82.51	-0.365
BnaA09T0504600ZS	BnH2A-09	191	20.62	10.47	41.76	106.81	-0.141
BnaC08T0345800ZS	BnH2A-10	199	21.82	9.98	37.08	83.42	-0.183
BnaC03T0220900ZS	BnH2A-11	134	14.23	10.44	29.42	98.36	-0.256
BnaC06T0189900ZS	BnH2A-12	138	14.79	10.22	26.73	91.3	-0.405
BnaA02T0008200ZS	BnH2A-13	152	16.13	11.05	33.17	91.12	-0.422
BnaC09T0433100ZS	BnH2A-14	174	18.73	10.21	36.3	96.49	-0.199
BnaA03T0100600ZS	BnH2A-15	148	15.66	10.52	38.98	92.36	-0.281
BnaC02T0123100ZS	BnH2A-16	148	15.71	10.6	41.69	92.36	-0.283
BnaA02T0101700ZS	BnH2A-17	148	15.71	10.6	40.85	93.65	-0.269
BnaC03T0114500ZS	BnH2A-18	148	15.7	10.6	41.76	92.36	-0.285
BnaA02T0372700ZS	BnH2A-19	157	16.65	10.54	39.99	88.34	-0.442
BnaC02T0498900ZS	BnH2A-20	151	16.08	10.49	45.41	83.44	-0.538
BnaA06T0348400ZS	BnH2A-21	153	16.11	10.43	43.97	85.69	-0.442
BnaC07T0346000ZS	BnH2A-22	152	16.05	10.43	42.74	87.5	-0.424
BnaA09T0057400ZS	BnH2A-23	151	15.95	10.34	38.2	86.75	-0.438
BnaC09T0044700ZS	BnH2A-24	148	15.44	10.47	38.95	89.86	-0.309
BnaC08T0528800ZS	BnH2A-25	144	14.84	10.36	40.61	94.24	-0.111
BnaA09T0664300ZS	BnH2A-26	142	14.89	10.35	32.73	87.32	-0.286
BnaA06T0053300ZS	BnH2A-27	142	14.75	10.32	37.27	90.07	-0.232
BnaC05T0066200ZS	BnH2A-28	142	14.75	10.32	37.27	90.07	-0.232
BnaA08T0297600ZS	BnH2A-29	142	14.77	10.32	37.27	90.77	-0.217
BnaC08T0189200ZS	BnH2A-30	142	14.77	10.32	37.27	90.77	-0.217
BnaA10T0108500ZS	BnH2A-31	130	13.69	10.16	44.11	95.46	-0.219
BnaC09T0370600ZS	BnH2A-32	130	13.71	10.16	45.01	94.69	-0.245
BnaC01T0212600ZS	BnH2A-33	133	14.05	9.93	47.34	93.31	-0.293
BnaA01T0165400ZS	BnH2A-34	132	13.92	10.05	45.15	94.02	-0.269
BnaA08T0022200ZS	BnH2A-35	133	13.95	10.1	40.81	93.31	-0.252
BnaA05T0174500ZS	BnH2A-36	133	14.02	10.1	42.57	93.98	-0.263
BnaC05T0293200ZS	BnH2A-37	133	13.98	10.1	39.83	93.98	-0.254
BnaA01T0312800ZS	BnH2A-38	134	14.05	9.93	39.46	94.03	-0.253
BnaC01T0386900ZS	BnH2A-39	134	14.05	9.93	39.46	94.03	-0.248
BnaC05T0383300ZS	BnH2A-40	133	14.01	9.99	39.68	94.74	-0.232
BnaA05T0350900ZS	BnH2A-41	133	13.93	10.05	39.68	94.74	-0.229
BnaC03T0444300ZS	BnH2A-42	133	13.93	10.05	39.68	94.74	-0.229
BnaA06T0048400ZS	BnH2B-01	257	28.67	6.95	52.74	68.56	-0.797
BnaC05T0060300ZS	BnH2B-02	319	35.35	8.7	54.82	71.44	-0.68
BnaA04T0072600ZS	BnH2B-03	138	15.27	10.05	24.11	72.17	-0.735
BnaC08T0338100ZS	BnH2B-04	138	15.22	10.05	23.15	71.52	-0.733
BnaC04T0331500ZS	BnH2B-05	138	15.26	10.05	24.94	70.07	-0.771
BnaC04T0486900ZS	BnH2B-06	154	16.64	10.02	30.47	75	-0.577
BnaC04T0193300ZS	BnH2B-07	148	16.18	10.02	28.17	75.34	-0.652
BnaA07T0164000ZS	BnH2B-08	149	16.26	10.02	28.04	75.5	-0.636
BnaC02T0122800ZS	BnH2B-09	142	15.41	10.02	20.63	70.92	-0.654
BnaC09T0433600ZS	BnH2B-10	150	16.39	10	26.05	68.4	-0.757
BnaA06T0183600ZS	BnH2B-11	137	15.04	10.03	22.03	74.82	-0.598
BnaC03T0608100ZS	BnH2B-12	132	14.56	10.08	19.57	76.89	-0.621
BnaC03T0272400ZS	BnH2B-13	151	16.57	10	32.84	75.1	-0.677
BnaA03T0230900ZS	BnH2B-14	155	16.85	10	32.25	75.74	-0.613
BnaC03T0114000ZS	BnH2B-15	141	15.4	10.11	25.94	72.77	-0.653
BnaA03T0100300ZS	BnH2B-16	141	15.39	10.11	26.77	72.77	-0.66
BnaC09T0444600ZS	BnH2B-17	141	15.36	10.06	24.32	73.48	-0.564
BnaA10T0161600ZS	BnH2B-18	141	15.36	10.08	18.35	73.48	-0.605
BnaC03T0109900ZS	BnH2B-19	142	15.44	10.08	22.59	72.96	-0.607
BnaA09T0694800ZS	BnH3-01	183	19.78	11.57	47.15	62.13	-0.528
BnaA09T0716200ZS	BnH3-02	181	19.89	11.44	44.87	61.71	-0.621
BnaA02T0216700ZS	BnH3-03	136	15.41	11.15	38.38	83.38	-0.602
BnaA07T0245800ZS	BnH3-04	136	15.41	11.15	38.38	83.38	-0.602
BnaC01T0011300ZS	BnH3-05	136	15.41	11.15	38.38	83.38	-0.602
BnaC02T0289900ZS	BnH3-06	136	15.41	11.15	38.38	83.38	-0.602
BnaC03T0049500ZS	BnH3-07	136	15.41	11.15	38.38	83.38	-0.602
BnaC06T0270500ZS	BnH3-08	136	15.41	11.15	38.38	83.38	-0.602
BnaA02T0360500ZS	BnH3-09	136	15.27	11.29	43.01	81.99	-0.551
BnaA05T0345200ZS	BnH3-10	136	15.27	11.29	43.01	81.99	-0.551
BnaA09T0091200ZS	BnH3-11	136	15.27	11.29	43.01	81.99	-0.551
BnaC02T0484400ZS	BnH3-12	136	15.27	11.29	43.01	81.99	-0.551
BnaC08T0191300ZS	BnH3-13	136	15.27	11.29	43.01	81.99	-0.551
BnaC09T0213500ZS	BnH3-14	136	15.27	11.29	43.01	81.99	-0.551
BnaC09T0087900ZS	BnH3-15	136	15.27	11.29	43.01	81.99	-0.551
BnaC03T0272200ZS	BnH4-01	103	11.41	11.48	45.35	86.12	-0.524
BnaC03T0608200ZS	BnH4-02	103	11.41	11.48	45.35	86.12	-0.524
BnaC04T0090900ZS	BnH4-03	103	11.41	11.48	45.35	86.12	-0.524
BnaC04T0193200ZS	BnH4-04	103	11.41	11.48	45.35	86.12	-0.524
BnaC04T0487500ZS	BnH4-05	103	11.41	11.48	45.35	86.12	-0.524
BnaC05T0055800ZS	BnH4-06	103	11.41	11.48	45.35	86.12	-0.524
BnaC05T0057400ZS	BnH4-07	103	11.41	11.48	45.35	86.12	-0.524
BnaC06T0425700ZS	BnH4-08	103	11.41	11.48	45.35	86.12	-0.524
BnaC08T0032400ZS	BnH4-09	103	11.41	11.48	45.35	86.12	-0.524
BnaC08T0534200ZS	BnH4-10	103	11.41	11.48	45.35	86.12	-0.524
Bo1g127320.1	BoH2A-01	134	14.23	10.25	31.42	91.79	-0.404
Bo9g088470.1	BoH2A-02	126	13.66	9.43	49.88	101.43	-0.021
Bo3g182540.1	BoH2A-03	135	14.42	10.28	34.67	95.48	-0.365
Bo6g039440.1	BoH2A-04	184	19.77	10.56	49.61	98.15	-0.199
Bo6g030680.1	BoH2A-05	135	14.4	10.28	36.73	95.48	-0.345
Bo4g119860.1	BoH2A-06	186	20.16	10.49	33.4	82.96	-0.377
Bo8g083750.1	BoH2A-07	161	17.52	10.23	34.49	95.22	-0.365
Bo3g032830.1	BoH2A-08	134	14.22	10.44	29.42	99.1	-0.237
Bo6g068090.1	BoH2A-09	136	14.54	10.28	27.6	92.65	-0.357
Bo2g002630.1	BoH2A-10	139	14.95	10.29	20.61	101.8	-0.294
Bo9g140890.1	BoH2A-11	148	15.6	10.52	38.04	90.41	-0.313
Bo3g017690.1	BoH2A-12	180	19.6	10.61	47.88	80.83	-0.536
Bo2g025290.1	BoH2A-13	148	15.69	10.6	40.85	92.36	-0.285
Bo2g155380.1	BoH2A-14	151	16.08	10.49	45.41	83.44	-0.538
Bo9g010460.1	BoH2A-15	153	16.05	10.34	38.64	86.93	-0.407
Bo8g112280.1	BoH2A-16	125	12.97	10.92	44.14	88.24	-0.29
Bo5g009330.1	BoH2A-17	142	14.75	10.32	37.27	90.07	-0.232
Bo8g058060.1	BoH2A-18	142	14.77	10.32	37.27	90.77	-0.217
Bo00779s030.1	BoH2A-19	133	13.98	10.1	39.83	93.98	-0.254
Bo1g108740.1	BoH2A-20	134	14.05	9.93	39.46	94.03	-0.248
Bo5g107390.1	BoH2A-21	133	13.93	10.05	39.68	94.74	-0.229
Bo3g076160.1	BoH2A-22	133	13.93	10.05	39.68	94.74	-0.229
Bo5g008800.1	BoH2B-01	319	35.38	8.2	56.67	67.81	-0.748
Bo6g067610.1	BoH2B-02	138	15.66	10.05	30.94	72.17	-0.951
Bo8g083030.1	BoH2B-03	138	15.22	10.05	23.15	71.52	-0.733
Bo4g121670.1	BoH2B-04	122	13.48	10.03	16.5	76.8	-0.588
Bo4g166700.1	BoH2B-05	154	16.64	10.02	30.47	75	-0.577
Bo4g069220.1	BoH2B-06	148	16.18	10.02	28.17	75.34	-0.652
Bo2g025250.1	BoH2B-07	142	15.41	10.02	20.63	70.92	-0.654
Bo9g140940.1	BoH2B-08	150	16.37	10	26.05	67.13	-0.773
Bo3g130260.1	BoH2B-09	132	14.56	10.08	19.57	76.89	-0.621
Bo3g040070.1	BoH2B-10	151	16.57	10	32.84	75.1	-0.677
Bo3g017650.1	BoH2B-11	136	14.84	10.11	26.53	74.71	-0.602
Bo9g148120.1	BoH2B-12	141	15.36	10.08	18.35	73.48	-0.605
Bo3g017110.1	BoH2B-13	142	15.44	10.08	22.59	72.96	-0.607
Bo8g117840.1	BoH3-01	186	20.32	11.33	48.62	61.13	-0.625
Bo3g005560.1	BoH3-02	135	15.21	11.29	42.34	82.59	-0.552
Bo6g086210.1	BoH3-03	136	15.41	11.15	38.38	83.38	-0.602
Bo1g003080.1	BoH3-04	136	15.41	11.15	38.38	83.38	-0.602
Bo3g006860.1	BoH3-05	136	15.41	11.15	38.38	83.38	-0.602
Bo2g085140.1	BoH3-06	171	19.5	10.98	44.84	97.13	-0.369
Bo2g149830.1	BoH3-07	136	15.27	11.29	43.01	81.99	-0.551
Bo2g009840.1	BoH3-08	136	15.27	11.29	43.01	81.99	-0.551
Bo9g058450.1	BoH3-09	136	15.27	11.29	43.01	81.99	-0.551
Bo9g018640.1	BoH3-10	136	15.27	11.29	43.01	81.99	-0.551
Bo9g172190.1	BoH3-11	136	15.27	11.29	43.01	81.99	-0.551
Bo4g127090.1	BoH3-12	136	15.27	11.29	43.01	81.99	-0.551
Bo4g127240.1	BoH3-13	159	17.99	10.97	45.18	79.94	-0.382
Bo4g166750.1	BoH4-01	103	11.41	11.48	45.35	86.12	-0.524
Bo3g040050.1	BoH4-02	103	11.41	11.48	45.35	86.12	-0.524
Bo3g031810.1	BoH4-03	103	11.41	11.48	45.35	86.12	-0.524
Bo3g130250.1	BoH4-04	103	11.41	11.48	45.35	86.12	-0.524
Bo5g008410.1	BoH4-05	103	11.41	11.48	45.35	86.12	-0.524
Bo4g030440.1	BoH4-06	103	11.41	11.48	45.35	86.12	-0.524
Bo8g010850.1	BoH4-07	103	11.41	11.48	45.35	86.12	-0.524
Bo8g112850.1	BoH4-08	103	11.41	11.48	45.35	86.12	-0.524
Bo6g120620.1	BoH4-09	103	11.41	11.48	45.35	86.12	-0.524
Bo4g069210.1	BoH4-10	103	11.41	11.48	45.35	86.12	-0.524
BraA01t027651E	BrH2A-01	134	14.23	10.25	31.42	91.79	-0.404
BraA04t041911E	BrH2A-02	136	14.47	10.36	26.7	95.51	-0.272
BraA07t035553E	BrH2A-03	138	14.8	10.22	26.73	92.03	-0.403
BraA09t005201E	BrH2A-04	136	14.57	10.32	23.37	98.38	-0.315
BraA02t028554E	BrH2A-05	152	16.13	11.05	33.17	91.12	-0.422
BraA10t046521E	BrH2A-06	148	15.61	10.52	39.71	90.41	-0.318
BraA03t008286E	BrH2A-07	148	15.67	10.52	39.88	92.36	-0.281
BraA02t029539E	BrH2A-08	148	15.71	10.6	40.85	93.65	-0.269
BraA02t032756E	BrH2A-09	157	16.64	10.54	39.99	87.71	-0.444
BraA06t022743E	BrH2A-10	168	17.97	10.51	51.9	90.77	-0.327
BraA09t000488E	BrH2A-11	150	15.83	10.34	39.22	86.67	-0.451
BraA09t006856E	BrH2A-12	142	14.96	10.47	28.5	87.32	-0.312
BraA06t019437E	BrH2A-13	142	14.75	10.32	37.27	90.07	-0.232
BraA08t041113E	BrH2A-14	142	14.77	10.32	37.27	90.77	-0.217
BraA01t025486E	BrH2A-15	132	13.92	10.05	45.15	94.02	-0.269
BraA08t037962E	BrH2A-16	133	13.95	10.1	40.81	93.31	-0.252
BraA05t015792E	BrH2A-17	133	14.02	10.1	42.57	93.98	-0.263
BraA01t027251E	BrH2A-18	134	14.05	9.93	39.46	94.03	-0.253
BraA05t017212E	BrH2A-19	135	14.19	10.28	42.49	102	-0.063
BraA06t019392E	BrH2B-01	296	33.44	8.62	51.6	63.82	-0.831
BraA07t035519E	BrH2B-02	138	15.3	10.05	30.13	70.8	-0.789
BraA09t005122E	BrH2B-03	138	15.22	10.05	23.15	71.52	-0.733
BraA04t041975E	BrH2B-04	138	15.24	10.05	24.94	70.8	-0.752
BraA04t043578E	BrH2B-05	149	16.26	10.02	28.58	74.83	-0.634
BraA07t035286E	BrH2B-06	149	16.26	10.02	28.04	75.5	-0.636
BraA02t029536E	BrH2B-07	142	15.38	10.02	18.34	70.92	-0.672
BraA10t046525E	BrH2B-08	150	16.37	10	26.05	67.13	-0.773
BraA03t009631E	BrH2B-09	191	21.33	10.28	40.72	73.19	-0.613
BraA03t008284E	BrH2B-10	141	15.39	10.11	26.77	72.77	-0.66
BraA03t008232E	BrH2B-11	145	15.63	10.08	20.57	72.83	-0.559
BraA09t007176E	BrH3-01	179	19.51	11.57	45.52	61.28	-0.58
BraA02t028873E	BrH3-02	136	15.41	11.15	38.38	83.38	-0.602
BraA03t007641E	BrH3-03	136	15.41	11.15	38.38	83.38	-0.602
BraA01t023871E	BrH3-04	136	15.41	11.15	38.38	83.38	-0.602
BraA02t030850E	BrH3-05	136	15.41	11.15	38.38	83.38	-0.602
BraA07t036156E	BrH3-06	136	15.41	11.15	38.38	83.38	-0.602
BraA08t041092E	BrH3-07	136	15.27	11.29	43.01	81.99	-0.551
BraA10t047449E	BrH3-08	136	15.27	11.29	43.01	81.99	-0.551
BraA02t033196E	BrH3-09	189	21.49	10.84	39.25	91.48	-0.472
BraA02t032629E	BrH3-10	136	15.27	11.29	43.01	81.99	-0.551
BraA09t000852E	BrH3-11	136	15.27	11.29	43.01	81.99	-0.551
BraA09t001936E	BrH3-12	136	15.27	11.29	43.01	81.99	-0.551
BraA10t047450E	BrH3-13	150	17.06	11	46.34	89.93	-0.385
BraA03t008898E	BrH4-01	103	11.41	11.48	45.35	86.12	-0.524
BraA03t009629E	BrH4-02	103	11.41	11.48	45.35	86.12	-0.524
BraA04t043581E	BrH4-03	103	11.41	11.48	45.35	86.12	-0.524
BraA04t044173E	BrH4-04	103	11.41	11.48	45.35	86.12	-0.524
BraA06t019349E	BrH4-05	103	11.41	11.48	45.35	86.12	-0.524
BraA06t019360E	BrH4-06	103	11.41	11.48	45.35	86.12	-0.524
BraA06t020847E	BrH4-07	103	11.41	11.48	45.35	86.12	-0.524
BraA07t035287E	BrH4-08	103	11.41	11.48	45.35	86.12	-0.524
BraA09t005126E	BrH4-09	103	11.41	11.48	45.35	86.12	-0.524
BraA09t006902E	BrH4-10	103	11.41	11.48	45.35	86.12	-0.524
