# Supplementary material for: Genome-wide Analysis of Core Histone Genes and Expression Dynamics of the H3 subfamily in Brassica napus
Source: Research Square preprint supplement (doi:10.21203/rs.3.rs-8114797/v1), 2025-12-05
Supplement: Supplementary file 4 [file f83b92f9d0a78afd22db39c9.xlsx]

## Sheet: Raw data
Spatio-temporal specific expression raw data of H3 members
ZS11 Gene ID	bud_2mm	bud_4mm	vegetative_rosette	cotyledon	filament	upper_stem_peel	middle_stem_peel	lower_stem_peel	petal	pollen	root	leaf_1	leaf_2	leaf_3	leaf_4	leaf_5	leaf_6	leaf_7	leaf_8	leaf_9	leaf_10	seed_14DAF	seed_20DAF	seed_28DAF	seed_36DAF	seed_42DAF	seed_50DAF	sepal	silique_2DAF	silique_4DAF	silique_6DAF	silique_8DAF	silique_10DAF	silique_12DAF	silique_20DAF	silique_30DAF
BnaC01G0011300ZS	503.234	297.609	304.604	291.435	492.022	363.458	441.202	502.301	747.984	86.322	446.702	297.465	279.774	290.086	325.428	339.684	335.688	360.035	372.498	355.828	362.881	545.184	394.909	484.711	278.522	234.36	201.879	647.406	1337.1	486.093	450.588	435.319	436.294	392.763	229.092	211.999
BnaC06G0270500ZS	153.721	122.101	91.918	79.255	248.761	114.393	113.636	120.873	278.978	42.063	140.677	139.471	129.252	127.675	128.522	129.079	127.133	132.075	132.918	125.089	122.13	219.193	185.035	204.874	103.937	82.076	56.115	278.842	185.188	182.96	168.179	142.39	143.145	144.653	80.373	101.828
BnaA07G0245800ZS	104.539	73.118	38.472	28.244	95.932	58.726	54.699	62.645	110.45	29.078	64.731	50.124	53.402	49.08	47.368	46.821	47.83	50.789	47.402	46.943	46.863	113.201	118.423	88.181	40.502	31.383	25.94	96.126	93.987	96.154	92.484	76.265	81.288	74.201	43.99	41.776
BnaC02G0289900ZS	161.859	64.868	34.232	31.774	50.868	71.632	72.175	81.339	57.335	20.707	61.317	48.171	52.891	54.287	54.688	59.354	57.386	61.614	59.745	60.774	62.35	70.252	90.588	85.328	36.183	35.695	27.472	49.499	204.434	176.804	140.866	110.013	77.055	81.683	52.787	46.577
BnaA02G0216700ZS	45.519	26.933	23.845	18.611	20.75	24.565	25.339	27.972	24.157	5.167	45.648	17.633	20.162	17.584	22.201	21.333	19.177	22.745	20.901	24.103	20.687	22.636	31.227	38.299	13.242	12.7	12.302	20.694	50.864	49.875	38.633	27.391	24.834	24.549	21.374	12.797
BnaA02G0360500ZS	140.765	39.009	20.316	19.756	0.63	14.582	11.141	12.005	1.158	0.05	28.389	8.115	7.203	5.049	7.117	6.335	4.62	5.17	3.811	2.065	3.815	40.46	55.877	126.161	4.022	1.187	1.443	0.124	218.663	176.232	117.036	81.934	53.872	43.277	13.707	6.765
BnaC08G0191300ZS	178.085	74.052	22.459	21.285	1.465	11.598	9.366	8.935	1.576	0	24.763	13.737	16.658	10.714	9.695	9.793	6.085	5.195	5.7	3.513	4.443	54.197	72.713	149.257	3.362	0.77	0.476	0.858	236.694	202.706	163.418	80.259	59.462	41.808	16.687	7.664
BnaA05G0345200ZS	124.027	57.566	37.739	37.974	2.792	19.232	17.006	23.851	3.95	0.934	63.695	15.9	16.344	12.451	17.372	14.371	11.257	10.283	11.52	7.427	9.858	60.536	54.541	137.093	7.238	3.671	6.894	1.586	192.647	247.21	169.443	116.982	84.377	61.53	35.029	18.048
BnaC09G0087900ZS	230.063	73.43	44.012	32.327	2.201	25.138	26.976	27.391	2.996	0.091	67.993	13.48	17.185	10.259	12.692	11.675	7.695	8.53	7.314	4.301	6.056	47.795	63.674	171.128	9.721	1.751	4.938	1.641	323.137	323.274	209.463	119.513	89.463	59.468	36.555	19.572
BnaC02G0484400ZS	133.599	32.359	21.062	17.65	0.949	10.856	9.068	9.81	2.41	0.075	23.685	5.076	4.973	4.518	4.797	4.388	3.469	2.469	3.09	1.95	2.563	31.945	50.244	113.453	4.243	0.911	1.015	2.534	196.091	166.605	109.395	75.123	44.161	39.79	12.078	6.892
BnaC09G0213500ZS	135.134	43.267	23.28	19.259	0.867	11.229	9.457	10.428	0.571	0.056	41.913	9.102	11.137	7.32	7.881	7.23	5.889	3.697	5.166	2.441	4.821	46.598	44.239	123.993	6.718	2.978	1.284	0.392	246.149	190.633	145.331	80.554	56.926	42.73	14.084	7.341
BnaC03G0049500ZS	15.571	8.364	7.494	4.501	7.914	4.216	4.638	3.21	21.096	3.448	9.921	6.657	6.158	5.154	6.307	6.514	6.098	5.417	6.195	5.395	5.291	14.256	12.25	27.597	4.488	4.136	4.225	17.277	31.213	18.234	13.997	14.796	12.802	14.764	6.782	16.258
BnaA09G0091200ZS	117.796	31.156	24.468	19.137	0.631	9.693	9.628	13.218	0.928	0.029	41.1	5.172	6.888	3.933	4.059	3.325	3.084	2.628	2.366	1.333	2.586	18.873	31.192	80.037	4.675	0.458	1.888	1.027	192.974	174.957	94.344	55.17	43.882	33.381	13.608	9.912
BnaA09G0694800ZS	17.341	4.918	1.729	3.241	0.549	3.316	3.217	3.715	0.435	0.363	2.276	1.247	1.898	1.188	0.786	1.77	1.048	0.93	1.443	0.641	0.819	7.169	10.068	10.873	0.713	0.482	0.473	0.297	22.129	25.284	17.138	9.492	5.975	4.554	1.565	1.104
BnaA09G0716200ZS	18.404	4.093	1.182	1.887	0.166	2.549	2.191	3.783	0.034	0.074	2.176	0.992	0.833	0.67	0.78	0.767	0.889	0.588	0.417	0.063	0.525	6.388	9.7	9.679	0.606	0.039	0.198	0.071	26.036	22.716	15.022	8.304	4.703	4.577	1.13	0.454
Spatio-temporal specific expression data(=Lg(raw data + 1)) of H3 members
ZS11 Gene ID	bud_2mm	bud_4mm	vegetative_rosette	cotyledon	filament	upper_stem_peel	middle_stem_peel	lower_stem_peel	petal	pollen	root	leaf_1	leaf_2	leaf_3	leaf_4	leaf_5	leaf_6	leaf_7	leaf_8	leaf_9	leaf_10	seed_14DAF	seed_20DAF	seed_28DAF	seed_36DAF	seed_42DAF	seed_50DAF	sepal	silique_2DAF	silique_4DAF	silique_6DAF	silique_8DAF	silique_10DAF	silique_12DAF	silique_20DAF	silique_30DAF
BnaC01T0011300ZS	2.70263	2.4751	2.48516	2.46603	2.69287	2.56165	2.64562	2.70183	2.87447	1.94112	2.65099	2.47489	2.44836	2.46402	2.51379	2.53235	2.52723	2.55755	2.57229	2.55246	2.56096	2.73734	2.5976	2.68638	2.44642	2.37173	2.30724	2.81185	3.12649	2.68761	2.65474	2.6398	2.64077	2.59523	2.3619	2.32838
BnaC06T0270500ZS	2.18955	2.09026	1.9681	1.90447	2.39752	2.06218	2.05932	2.08591	2.44712	1.6341	2.1513	2.14759	2.11478	2.10949	2.11234	2.11421	2.10766	2.1241	2.12684	2.10068	2.09036	2.3428	2.26959	2.3136	2.02093	1.91948	1.75675	2.44691	2.26995	2.26472	2.22835	2.15652	2.1588	2.16332	1.91048	2.01211
BnaA07T0245800ZS	2.02341	1.86992	1.59629	1.46604	1.98647	1.77616	1.74585	1.80376	2.04708	1.47825	1.81777	1.70862	1.73561	1.69966	1.68456	1.67962	1.68869	1.71424	1.68486	1.68073	1.68	2.05767	2.07709	1.95027	1.61807	1.51032	1.4304	1.98734	1.97766	1.98746	1.97074	1.88798	1.91534	1.87622	1.65312	1.6312
BnaC02T0289900ZS	2.21181	1.81867	1.54694	1.51553	1.7149	1.86113	1.86436	1.91561	1.76593	1.3366	1.79461	1.69171	1.73152	1.74262	1.74576	1.78071	1.76631	1.79667	1.78351	1.79081	1.80175	1.8528	1.96184	1.93615	1.57034	1.56461	1.45442	1.70328	2.31267	2.24994	2.15188	2.04537	1.8924	1.91742	1.73068	1.6774
BnaA02T0216700ZS	1.66763	1.44612	1.39524	1.2925	1.33746	1.40765	1.4206	1.46198	1.40066	0.790074	1.66883	1.27028	1.32556	1.26914	1.36551	1.34895	1.30486	1.37557	1.34046	1.39973	1.3362	1.37357	1.50822	1.59438	1.15357	1.13672	1.12392	1.33634	1.71487	1.7065	1.59806	1.45318	1.41219	1.40737	1.34974	1.13978
BnaA02T0360500ZS	2.15157	1.60216	1.32871	1.31714	0.212188	1.19262	1.08425	1.11411	0.334051	0.0211893	1.46818	0.959757	0.913973	0.781684	0.909396	0.8654	0.749736	0.790285	0.682235	0.48643	0.682596	1.61763	1.75494	2.10435	0.700877	0.339849	0.387923	0.0507663	2.34176	2.24854	2.07201	1.91873	1.73935	1.64618	1.16752	0.890141
BnaC08T0191300ZS	2.25306	1.87536	1.37031	1.34801	0.391817	1.1003	1.01561	0.997168	0.410946	0	1.411	1.16841	1.24694	1.06871	1.02918	1.03314	0.85034	0.792041	0.826075	0.654465	0.735838	1.74192	1.86754	2.17683	0.639686	0.247973	0.169086	0.269046	2.37602	2.309	2.21595	1.90987	1.78148	1.63152	1.24765	0.937718
BnaA05T0345200ZS	2.097	1.76765	1.58815	1.59077	0.578868	1.30604	1.25542	1.39534	0.694605	0.286456	1.81087	1.22789	1.23915	1.12875	1.26416	1.1867	1.08838	1.05242	1.0976	0.925673	1.03575	1.78913	1.74461	2.14017	0.915822	0.66941	0.897297	0.412629	2.28701	2.39482	2.23158	2.07182	1.93134	1.79609	1.55665	1.27985
BnaC09T0087900ZS	2.36373	1.87175	1.65333	1.5228	0.505286	1.41727	1.44679	1.45318	0.601625	0.0378248	1.83881	1.16077	1.25971	1.0515	1.13647	1.10295	0.93927	0.979093	0.91981	0.724358	0.848559	1.68838	1.81073	2.23585	1.03024	0.439491	0.77364	0.421768	2.51073	2.51091	2.32318	2.08103	1.95647	1.78153	1.57467	1.31328
BnaC02T0484400ZS	2.12904	1.52321	1.34364	1.27068	0.289812	1.07394	1.00294	1.03383	0.532754	0.0314085	1.39243	0.783618	0.776193	0.741782	0.763203	0.731428	0.65021	0.540204	0.611723	0.469822	0.551816	1.51779	1.70964	2.05863	0.71958	0.281261	0.304275	0.548267	2.29467	2.22429	2.04295	1.88152	1.65476	1.61055	1.11654	0.897187
BnaC09T0213500ZS	2.13397	1.64608	1.38525	1.30662	0.271144	1.08739	1.01941	1.05797	0.196176	0.0236639	1.63259	1.00441	1.08411	0.920123	0.948462	0.9154	0.838156	0.671821	0.790004	0.536685	0.764998	1.67759	1.65551	2.09689	0.887505	0.599665	0.358696	0.143639	2.39296	2.28247	2.16534	1.91145	1.76287	1.64078	1.17852	0.921218
BnaC03T0049500ZS	1.21935	0.971461	0.929112	0.740442	0.950073	0.717338	0.751125	0.624282	1.34431	0.648165	1.03826	0.884059	0.854792	0.789157	0.863739	0.875871	0.851136	0.807332	0.857031	0.805841	0.79872	1.18344	1.12222	1.45632	0.739414	0.710625	0.718086	1.2619	1.50803	1.28407	1.176	1.19855	1.13994	1.19767	0.891091	1.23699
BnaA09T0091200ZS	2.0748	1.50726	1.40599	1.30399	0.212454	1.0291	1.02645	1.15284	0.285107	0.0124154	1.62428	0.790426	0.896967	0.693111	0.704065	0.635986	0.611086	0.559667	0.527114	0.367915	0.55461	1.29826	1.50775	1.90868	0.753966	0.163758	0.460597	0.306854	2.28774	2.24541	1.97929	1.7495	1.65207	1.53632	1.16459	1.0379
BnaA09T0694800ZS	1.26342	0.772175	0.436004	0.627468	0.190051	0.635081	0.625004	0.673482	0.156852	0.134496	0.515344	0.351603	0.462098	0.340047	0.251881	0.44248	0.31133	0.285557	0.387923	0.215109	0.259833	0.912169	1.04407	1.07456	0.233757	0.170848	0.168203	0.11294	1.36416	1.41969	1.25859	1.02086	0.843544	0.744606	0.409087	0.323046
BnaA09T0716200ZS	1.28789	0.706974	0.338855	0.460447	0.0666986	0.550106	0.503927	0.6797	0.0145205	0.0310043	0.50188	0.299289	0.263162	0.222716	0.25042	0.247237	0.276232	0.20085	0.15137	0.0265333	0.18327	0.868527	1.02938	1.02853	0.205746	0.0166155	0.0784568	0.0297895	1.43194	1.37504	1.20472	0.96867	0.756103	0.746401	0.32838	0.162564

## Sheet: Lg(Raw data+1)
Spatio-temporal specific expression of H3 members
ZS11 Gene ID	bud_2mm	bud_4mm	vegetative_rosette	cotyledon	filament	upper_stem_peel	middle_stem_peel	lower_stem_peel	petal	pollen	root	leaf_1	leaf_2	leaf_3	leaf_4	leaf_5	leaf_6	leaf_7	leaf_8	leaf_9	leaf_10	seed_14DAF	seed_20DAF	seed_28DAF	seed_36DAF	seed_42DAF	seed_50DAF	sepal	silique_2DAF	silique_4DAF	silique_6DAF	silique_8DAF	silique_10DAF	silique_12DAF	silique_20DAF	silique_30DAF
BnaC01T0011300ZS	2.70263	2.4751	2.48516	2.46603	2.69287	2.56165	2.64562	2.70183	2.87447	1.94112	2.65099	2.47489	2.44836	2.46402	2.51379	2.53235	2.52723	2.55755	2.57229	2.55246	2.56096	2.73734	2.5976	2.68638	2.44642	2.37173	2.30724	2.81185	3.12649	2.68761	2.65474	2.6398	2.64077	2.59523	2.3619	2.32838
BnaC06T0270500ZS	2.18955	2.09026	1.9681	1.90447	2.39752	2.06218	2.05932	2.08591	2.44712	1.6341	2.1513	2.14759	2.11478	2.10949	2.11234	2.11421	2.10766	2.1241	2.12684	2.10068	2.09036	2.3428	2.26959	2.3136	2.02093	1.91948	1.75675	2.44691	2.26995	2.26472	2.22835	2.15652	2.1588	2.16332	1.91048	2.01211
BnaA07T0245800ZS	2.02341	1.86992	1.59629	1.46604	1.98647	1.77616	1.74585	1.80376	2.04708	1.47825	1.81777	1.70862	1.73561	1.69966	1.68456	1.67962	1.68869	1.71424	1.68486	1.68073	1.68	2.05767	2.07709	1.95027	1.61807	1.51032	1.4304	1.98734	1.97766	1.98746	1.97074	1.88798	1.91534	1.87622	1.65312	1.6312
BnaC02T0289900ZS	2.21181	1.81867	1.54694	1.51553	1.7149	1.86113	1.86436	1.91561	1.76593	1.3366	1.79461	1.69171	1.73152	1.74262	1.74576	1.78071	1.76631	1.79667	1.78351	1.79081	1.80175	1.8528	1.96184	1.93615	1.57034	1.56461	1.45442	1.70328	2.31267	2.24994	2.15188	2.04537	1.8924	1.91742	1.73068	1.6774
BnaA02T0216700ZS	1.66763	1.44612	1.39524	1.2925	1.33746	1.40765	1.4206	1.46198	1.40066	0.790074	1.66883	1.27028	1.32556	1.26914	1.36551	1.34895	1.30486	1.37557	1.34046	1.39973	1.3362	1.37357	1.50822	1.59438	1.15357	1.13672	1.12392	1.33634	1.71487	1.7065	1.59806	1.45318	1.41219	1.40737	1.34974	1.13978
BnaA02T0360500ZS	2.15157	1.60216	1.32871	1.31714	0.212188	1.19262	1.08425	1.11411	0.334051	0.0211893	1.46818	0.959757	0.913973	0.781684	0.909396	0.8654	0.749736	0.790285	0.682235	0.48643	0.682596	1.61763	1.75494	2.10435	0.700877	0.339849	0.387923	0.0507663	2.34176	2.24854	2.07201	1.91873	1.73935	1.64618	1.16752	0.890141
BnaC08T0191300ZS	2.25306	1.87536	1.37031	1.34801	0.391817	1.1003	1.01561	0.997168	0.410946	0	1.411	1.16841	1.24694	1.06871	1.02918	1.03314	0.85034	0.792041	0.826075	0.654465	0.735838	1.74192	1.86754	2.17683	0.639686	0.247973	0.169086	0.269046	2.37602	2.309	2.21595	1.90987	1.78148	1.63152	1.24765	0.937718
BnaA05T0345200ZS	2.097	1.76765	1.58815	1.59077	0.578868	1.30604	1.25542	1.39534	0.694605	0.286456	1.81087	1.22789	1.23915	1.12875	1.26416	1.1867	1.08838	1.05242	1.0976	0.925673	1.03575	1.78913	1.74461	2.14017	0.915822	0.66941	0.897297	0.412629	2.28701	2.39482	2.23158	2.07182	1.93134	1.79609	1.55665	1.27985
BnaC09T0087900ZS	2.36373	1.87175	1.65333	1.5228	0.505286	1.41727	1.44679	1.45318	0.601625	0.0378248	1.83881	1.16077	1.25971	1.0515	1.13647	1.10295	0.93927	0.979093	0.91981	0.724358	0.848559	1.68838	1.81073	2.23585	1.03024	0.439491	0.77364	0.421768	2.51073	2.51091	2.32318	2.08103	1.95647	1.78153	1.57467	1.31328
BnaC02T0484400ZS	2.12904	1.52321	1.34364	1.27068	0.289812	1.07394	1.00294	1.03383	0.532754	0.0314085	1.39243	0.783618	0.776193	0.741782	0.763203	0.731428	0.65021	0.540204	0.611723	0.469822	0.551816	1.51779	1.70964	2.05863	0.71958	0.281261	0.304275	0.548267	2.29467	2.22429	2.04295	1.88152	1.65476	1.61055	1.11654	0.897187
BnaC09T0213500ZS	2.13397	1.64608	1.38525	1.30662	0.271144	1.08739	1.01941	1.05797	0.196176	0.0236639	1.63259	1.00441	1.08411	0.920123	0.948462	0.9154	0.838156	0.671821	0.790004	0.536685	0.764998	1.67759	1.65551	2.09689	0.887505	0.599665	0.358696	0.143639	2.39296	2.28247	2.16534	1.91145	1.76287	1.64078	1.17852	0.921218
BnaC03T0049500ZS	1.21935	0.971461	0.929112	0.740442	0.950073	0.717338	0.751125	0.624282	1.34431	0.648165	1.03826	0.884059	0.854792	0.789157	0.863739	0.875871	0.851136	0.807332	0.857031	0.805841	0.79872	1.18344	1.12222	1.45632	0.739414	0.710625	0.718086	1.2619	1.50803	1.28407	1.176	1.19855	1.13994	1.19767	0.891091	1.23699
BnaA09T0091200ZS	2.0748	1.50726	1.40599	1.30399	0.212454	1.0291	1.02645	1.15284	0.285107	0.0124154	1.62428	0.790426	0.896967	0.693111	0.704065	0.635986	0.611086	0.559667	0.527114	0.367915	0.55461	1.29826	1.50775	1.90868	0.753966	0.163758	0.460597	0.306854	2.28774	2.24541	1.97929	1.7495	1.65207	1.53632	1.16459	1.0379
BnaA09T0694800ZS	1.26342	0.772175	0.436004	0.627468	0.190051	0.635081	0.625004	0.673482	0.156852	0.134496	0.515344	0.351603	0.462098	0.340047	0.251881	0.44248	0.31133	0.285557	0.387923	0.215109	0.259833	0.912169	1.04407	1.07456	0.233757	0.170848	0.168203	0.11294	1.36416	1.41969	1.25859	1.02086	0.843544	0.744606	0.409087	0.323046
BnaA09T0716200ZS	1.28789	0.706974	0.338855	0.460447	0.0666986	0.550106	0.503927	0.6797	0.0145205	0.0310043	0.50188	0.299289	0.263162	0.222716	0.25042	0.247237	0.276232	0.20085	0.15137	0.0265333	0.18327	0.868527	1.02938	1.02853	0.205746	0.0166155	0.0784568	0.0297895	1.43194	1.37504	1.20472	0.96867	0.756103	0.746401	0.32838	0.162564
