# Supplementary figures and images for: Genome-wide Analysis of Core Histone Genes and Expression Dynamics of the H3 subfamily in Brassica napus
Source: Research Square preprint supplement (doi:10.21203/rs.3.rs-8114797/v1), 2025-12-05

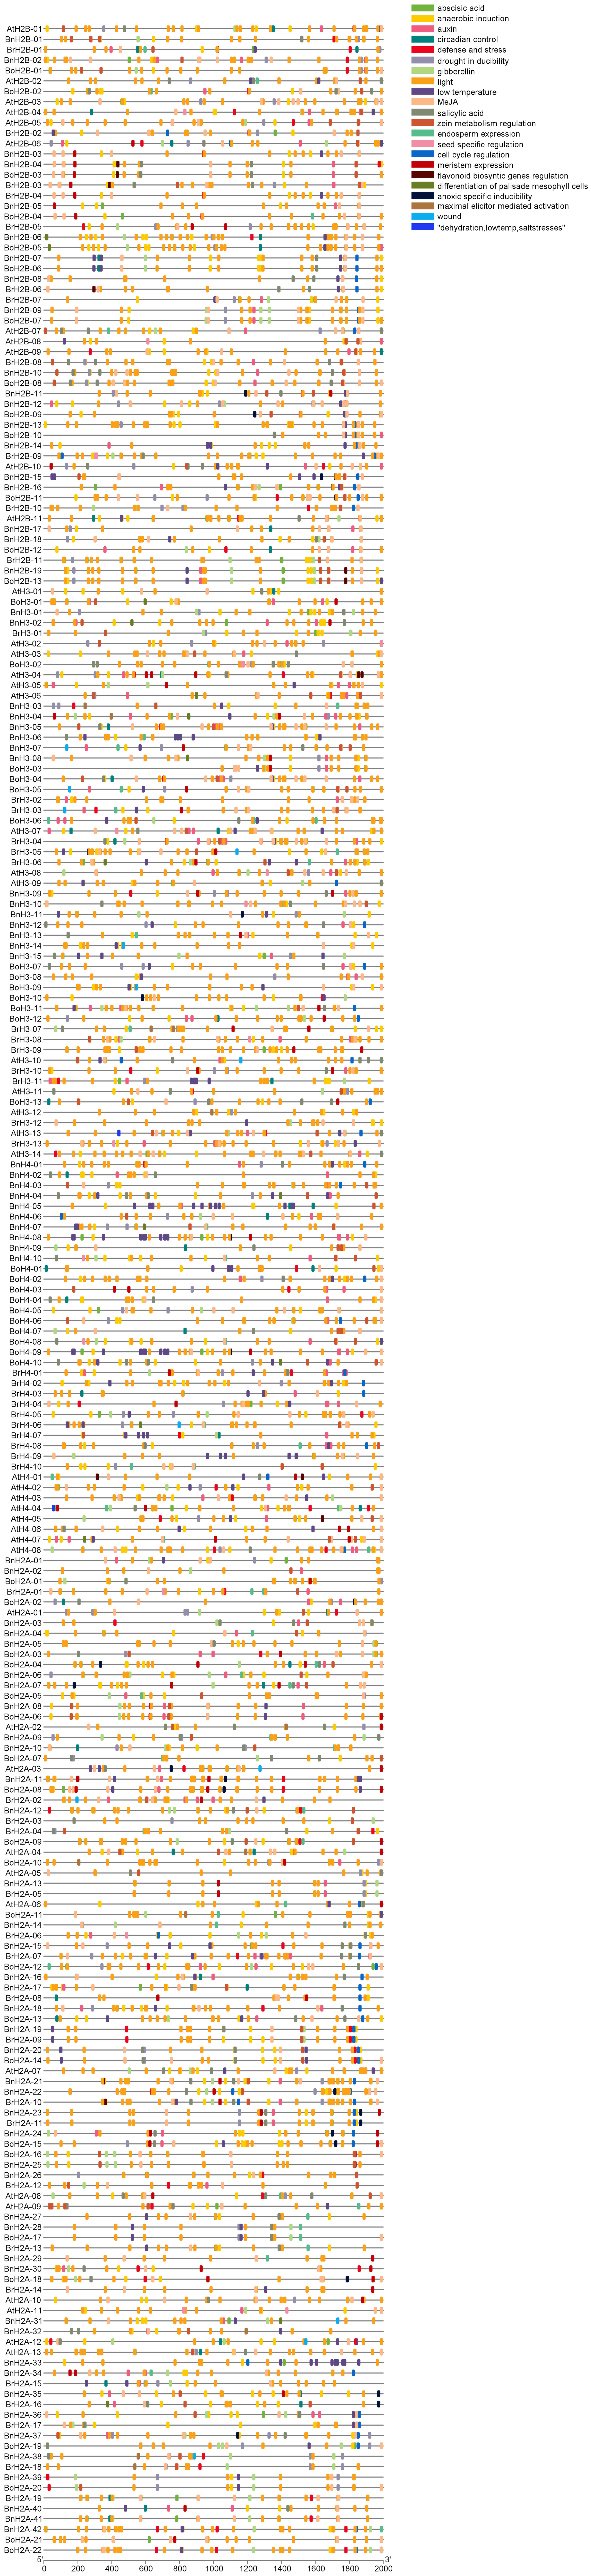


Analysis of CAREs was conducted in the CHF of *B. napus*, *B. rapa*, *B. oleracea* and *A. thaliana*

Supplement: Supplementary file 3 [file bb722efc2eb758bac7542c7b.docx]
